# Supplementary material for: Burden and Nutritional Determinants of Metabolic Bone Disease of Prematurity in Very Low Birth Weight Infants: A Prospective Cohort Study from a Tertiary Neonatal Unit
Source: Research Square preprint supplement (doi:10.21203/rs.3.rs-8538023/v1), 2026-02-13
Supplement: Supplementary file 1 [file 015f32696831af2ea63465c1.docx]

**Supplementary material**

Table 1 Serum Phosphorus, Calcium and Vitamin D deficiency at 40 weeks of post menstruation age

| Variables | Hypophosphatemia | Serum phosphorus* | P value | Serum calcium * | P value | Vitamin D deficiency | P value |
| --- | --- | --- | --- | --- | --- | --- | --- |
| (n=102) | 64 (64.6) | 5.49 ±1.17 |  | 9.67±0.48 |  | 9 (9.1%) |  |
| Gestational age | | | |  |  |  |  |
| <28 weeks (n=14) | 6 (46.1) | 4.69 ±1.09 | 0.303 | 9.62±0.41 (n=13) | 0.87 | 1(7.7%) | 0.285 |
| 28-32 weeks (n=61) | 39 (66.1) | 5.52 ±1.09 | 9.60±0.49 (n=59) | 4 (6.8%) |
| >32 weeks (n=27) | 19 (70.4) | 5.79 ±1.39 | 9.83±0.46 (n=27) | 4(14.3%) |
| Birth weight | | | |  |  |  |  |
| <1000gm (n=28) | 12(46.1) | 4.96 ±1.00 | 0.007 | 9.54±0.57 (n=26) | 0.91 | 2(7.7%) | 0.580 |
| 1000-1500gm (n=57) | 37( 64.9) | 5.52 ±1.26 | 9.73±0.46 (n=57) | 6(10.5%) |
| >1500gm (n=17) | 15 (93.7) | 6.20 ±0.66 | 9.63±0.30 (n=16) | 1(6.3%) |
| Intrauterine growth | | | |  |  |  |  |
| SGA (n=41) | 24 (60) | 5.42 ±1.21 | 0.578 | 9.64±0.55 (n=40) | 0.95 | 7 (17.5) | 0.374 |
| AGA (n=60) | 39 (67.24) | 5.52 ±1.17 | 9.69±0.42 (n=58) | 2 (3.45) |
| LGA (n=1) | 1 (100) | 5.89 | 9.76 (n=1) | 0 |
| Data are represented as n (%), *Mean ± S.D ,n (%) denotes the number of total subjects with their percentage in brackets, Hypocalcaemia- serum calcium < 7 mg/dl  SGA- Small for gestational age ( birth weight <10th centile for gestational age), AGA- Appropriate for gestational age, LGA- Large for gestational age (percentile of birth weight >90th centile for gestational age) | | | | | | | |
